# Supplementary material for: Butremycin, the 3-Hydroxyl Derivative of Ikarugamycin and a Protonated Aromatic Tautomer of 5′-Methylthioinosine from a Ghanaian Micromonospora sp. K310
Source: MDPI journal article supplement (doi:10.3390/md12020999), 2014-02-14

## Supplementary Information

**Figure S1.** MS fragmentation pattern for butremycin (**2**) obtained from the HPLC/HRESIMS data of pure compound.

**Figure S2.**  $^1\text{H}$  NMR spectrum of butremycin (**2**).

**Figure S3.**  $^{13}\text{C}$  NMR spectrum of butremycin (**2**).

**Figure S4.** gHSQCAD spectrum of butremycin (**2**).

**Figure S5.**  $^1\text{H}$ - $^1\text{H}$  gCOSY spectrum of butremycin (**2**).

**Figure S6.** HMBCAD spectrum of butremycin (**2**).

**Figure S7.** TROESY spectrum of butremycin (**2**).

**Figure S8.**  $^1\text{H}$  NMR spectrum of compound (**3**).

**Figure S9.**  $^{13}\text{C}$  NMR spectrum of compound (**3**).

**Figure S10.** gHSQCAD spectrum of compound (**3**).

**Figure S11.**  $^1\text{H}$ - $^1\text{H}$  gCOSY spectrum of compound (**3**).

**Figure S12.** HMBCAD spectrum of compound (**3**).

**Figure S13.** *Micromonospora* sp. K310 growing on starch casein agar with sea salts.

**Figure S14.** PDA/UV profiles obtained from the HPLC/HRESIMS data of the crude extracts of *Micromonospora* sp. K310.

**Figure S1.** MS fragmentation pattern for butremycin (2) obtained from the HPLC/HRESIMS data of pure compound.

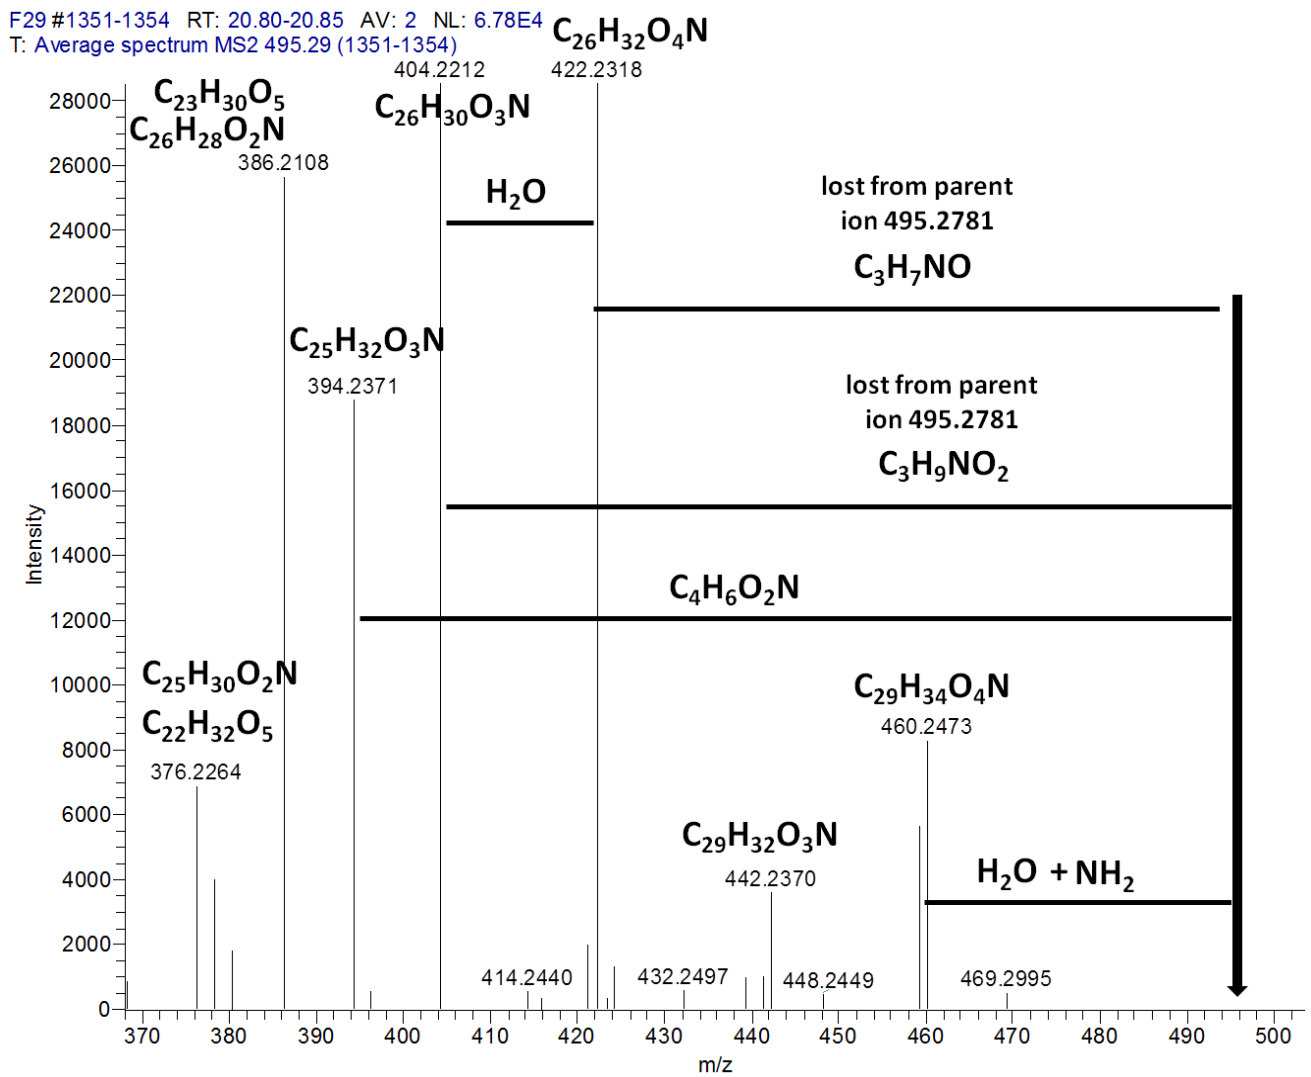

**Figure S2.**  $^1\text{H}$  NMR spectrum of butremycin (2).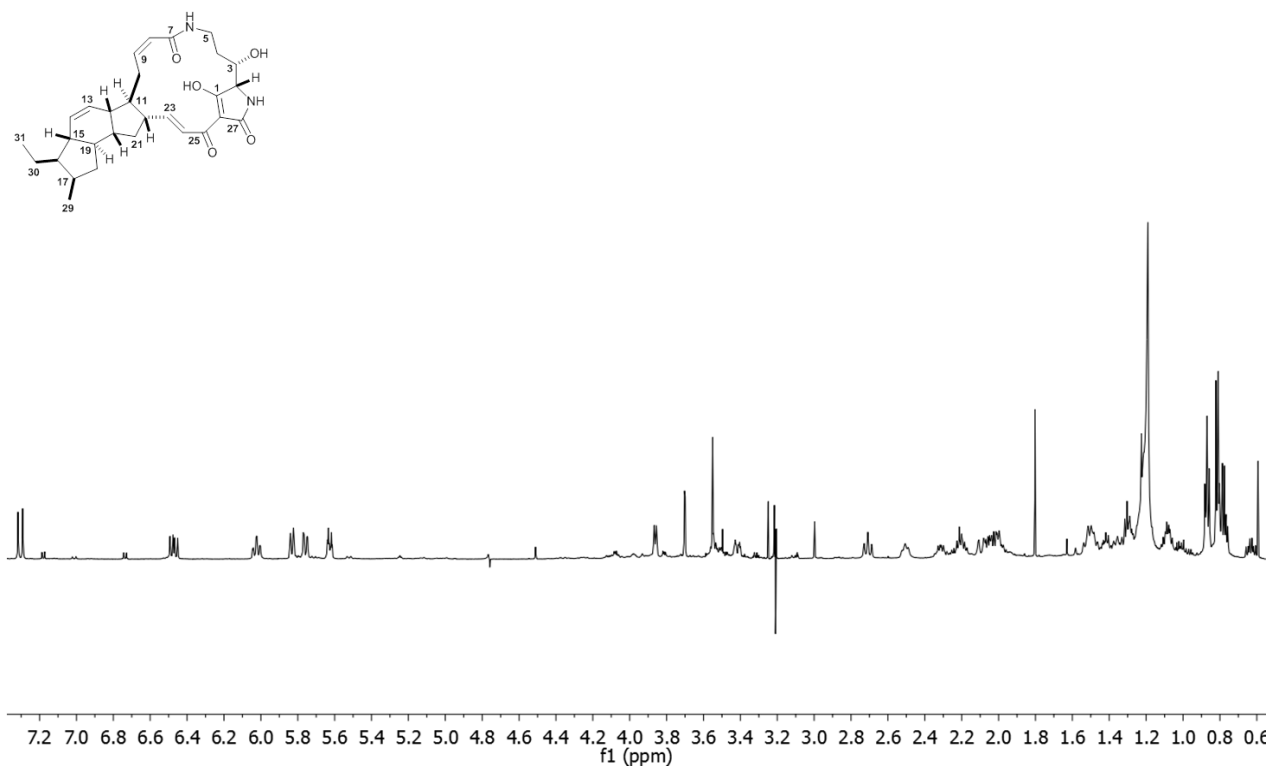**Figure S3.**  $^{13}\text{C}$  NMR spectrum of butremycin (2).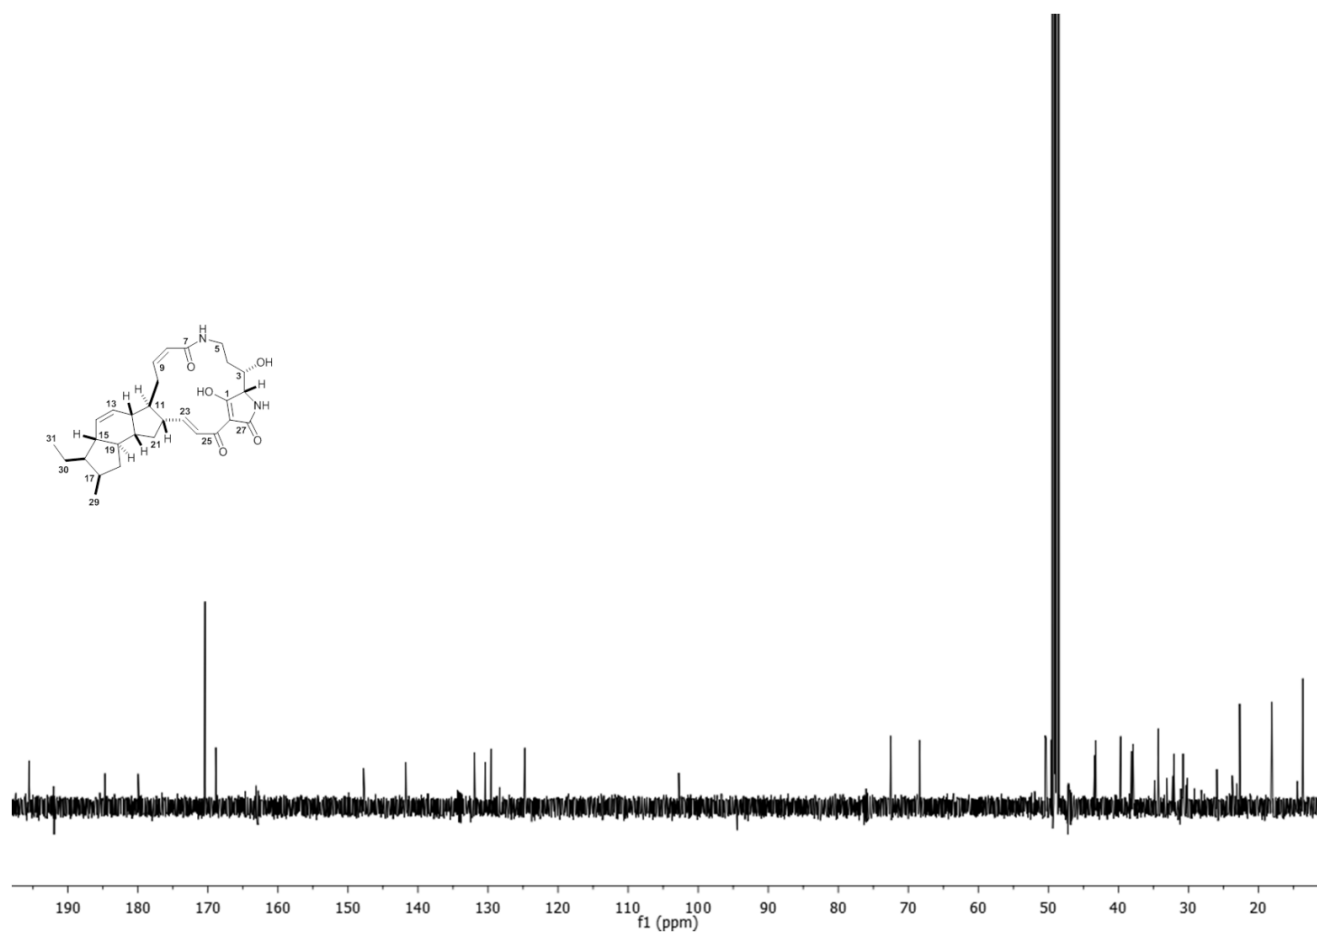

**Figure S4.** gHSQCAD spectrum of butremycin (2).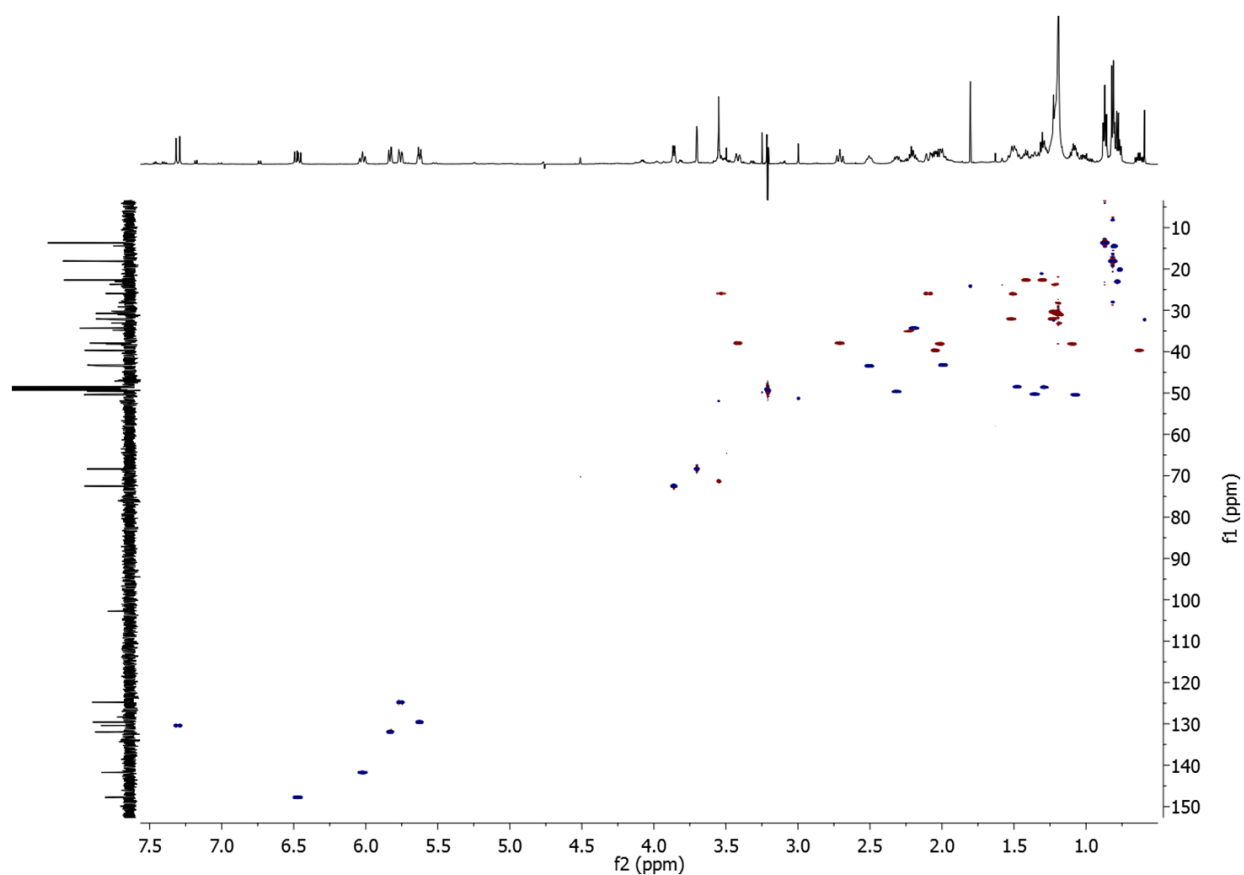**Figure S5.**  $^1\text{H}$ - $^1\text{H}$  gCOSY spectrum of butremycin (2).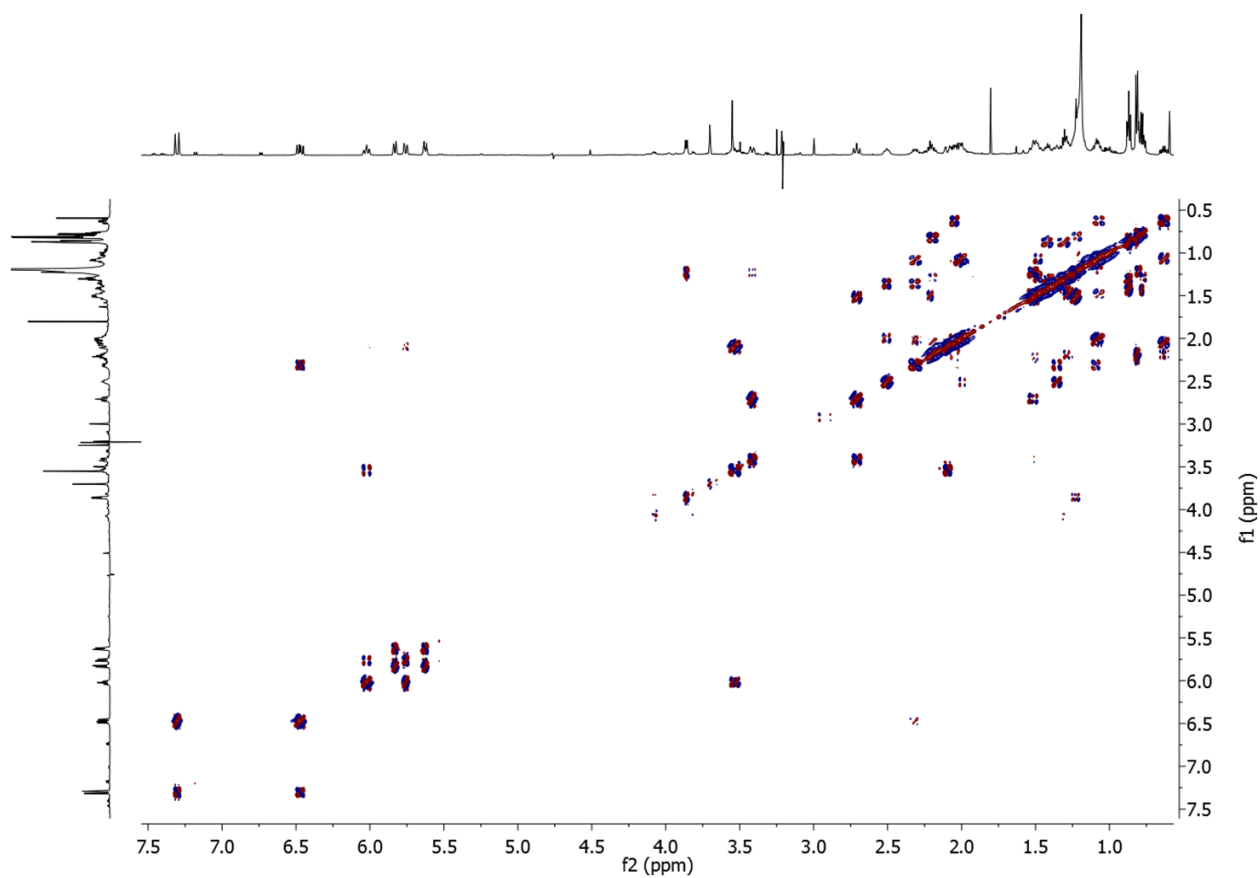

**Figure S6.** HMBCAD spectrum of butremycin (2).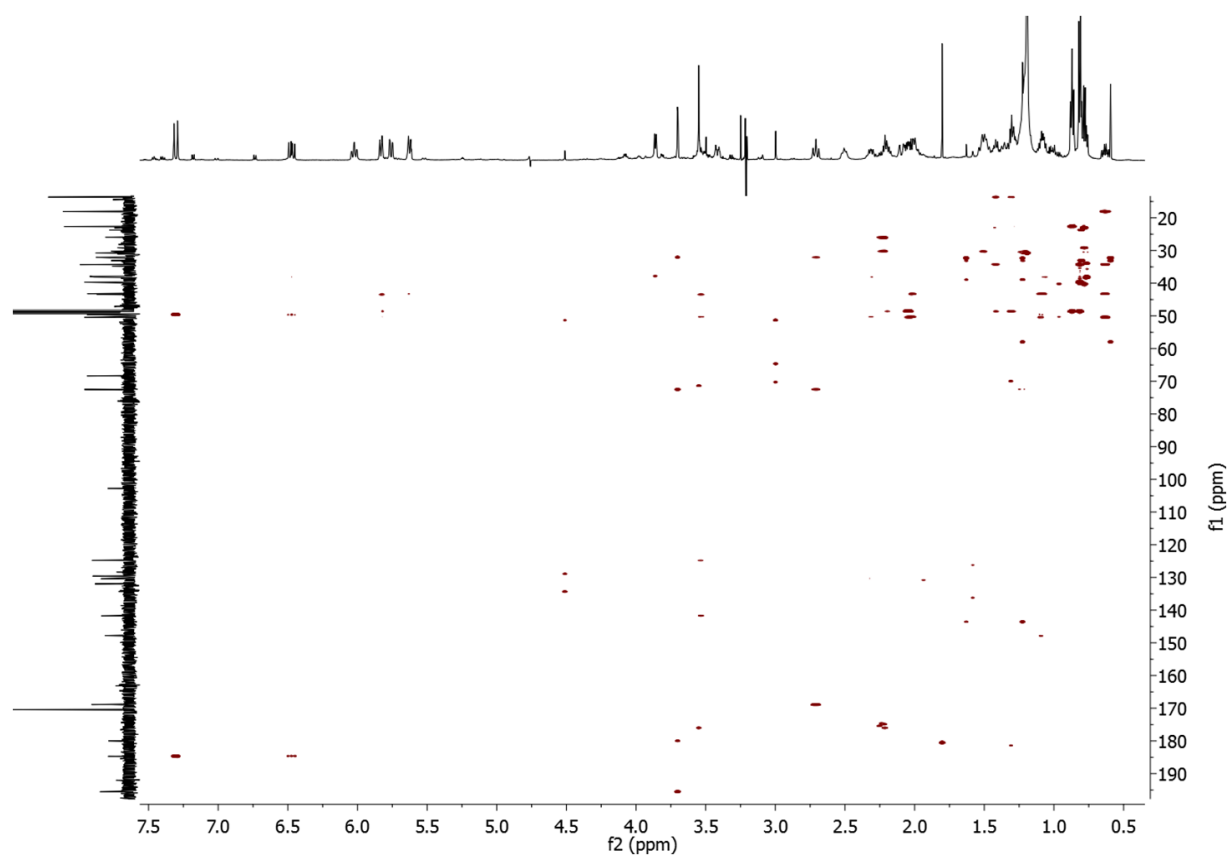**Figure S7.** TROESY spectrum of butremycin (2).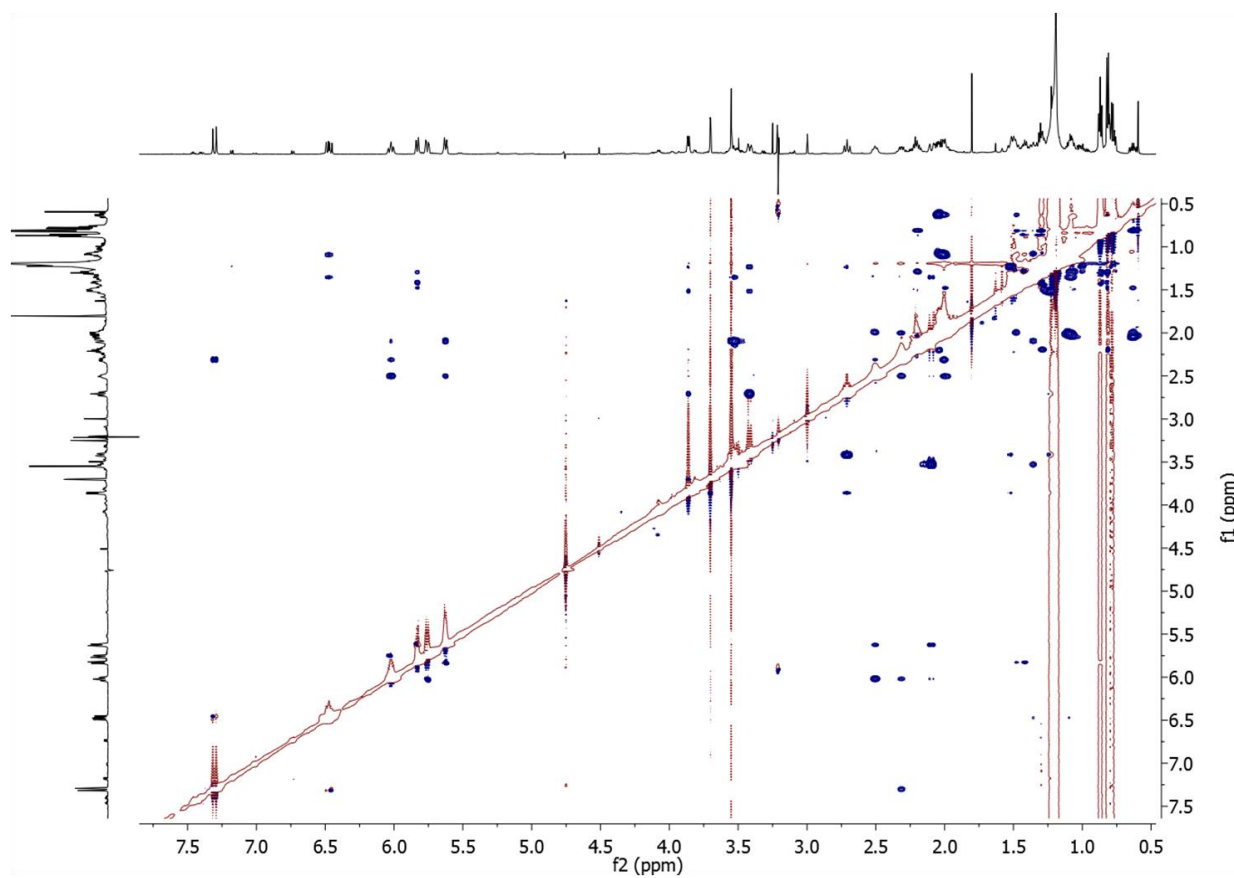

**Figure S8.**  $^1\text{H}$  NMR spectrum of compound (3).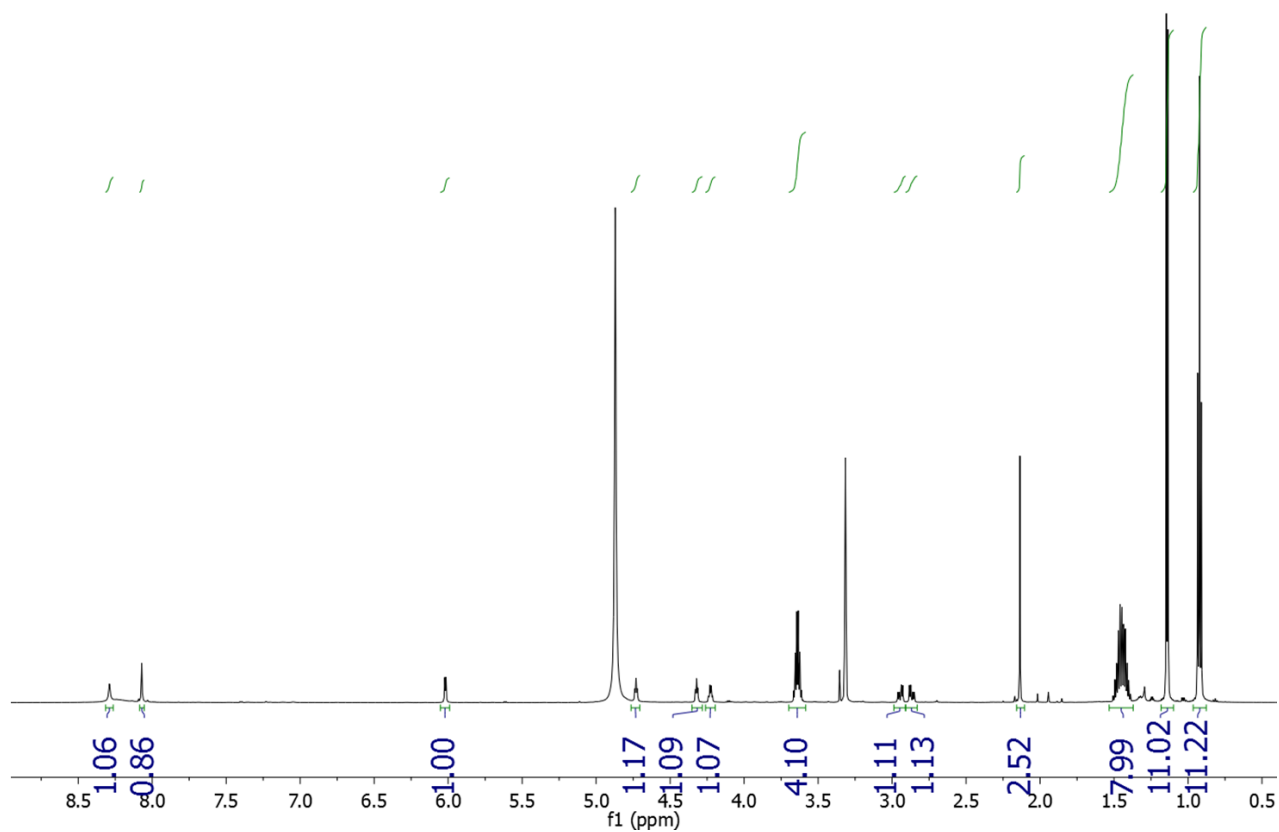**Figure S9.**  $^{13}\text{C}$  NMR spectrum of compound (3).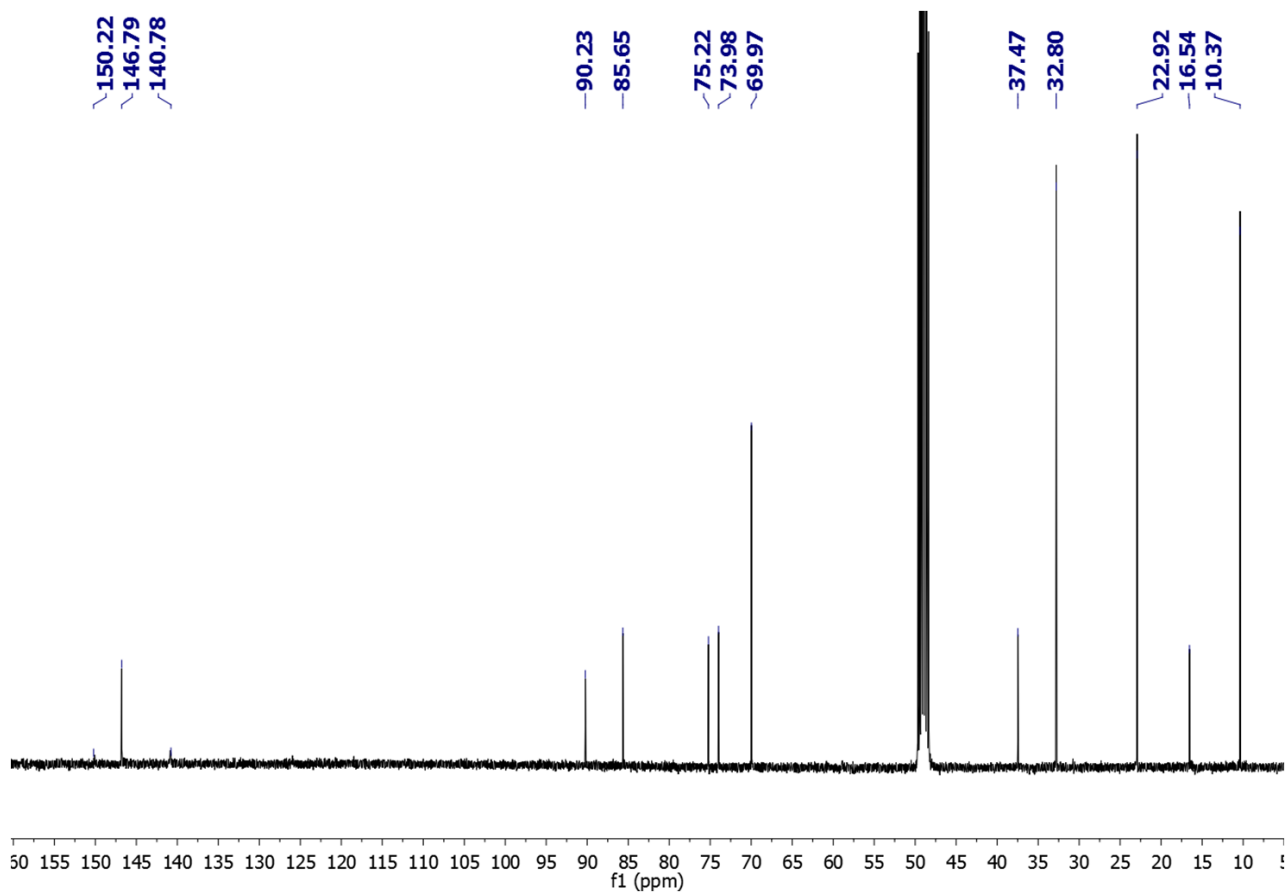

**Figure S10.** gHSQCAD spectrum of compound (3).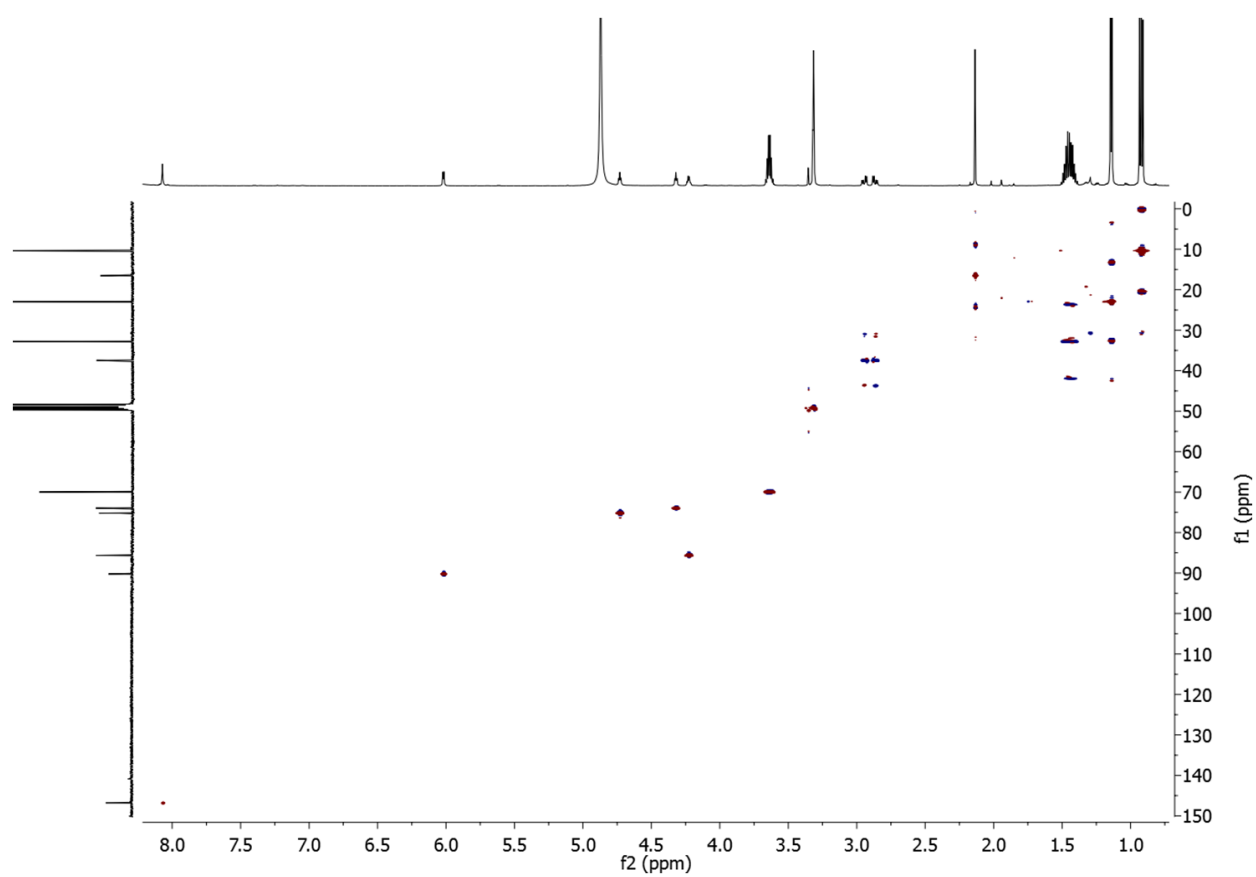**Figure S11.**  $^1\text{H}$ - $^1\text{H}$  gCOSY spectrum of compound (3).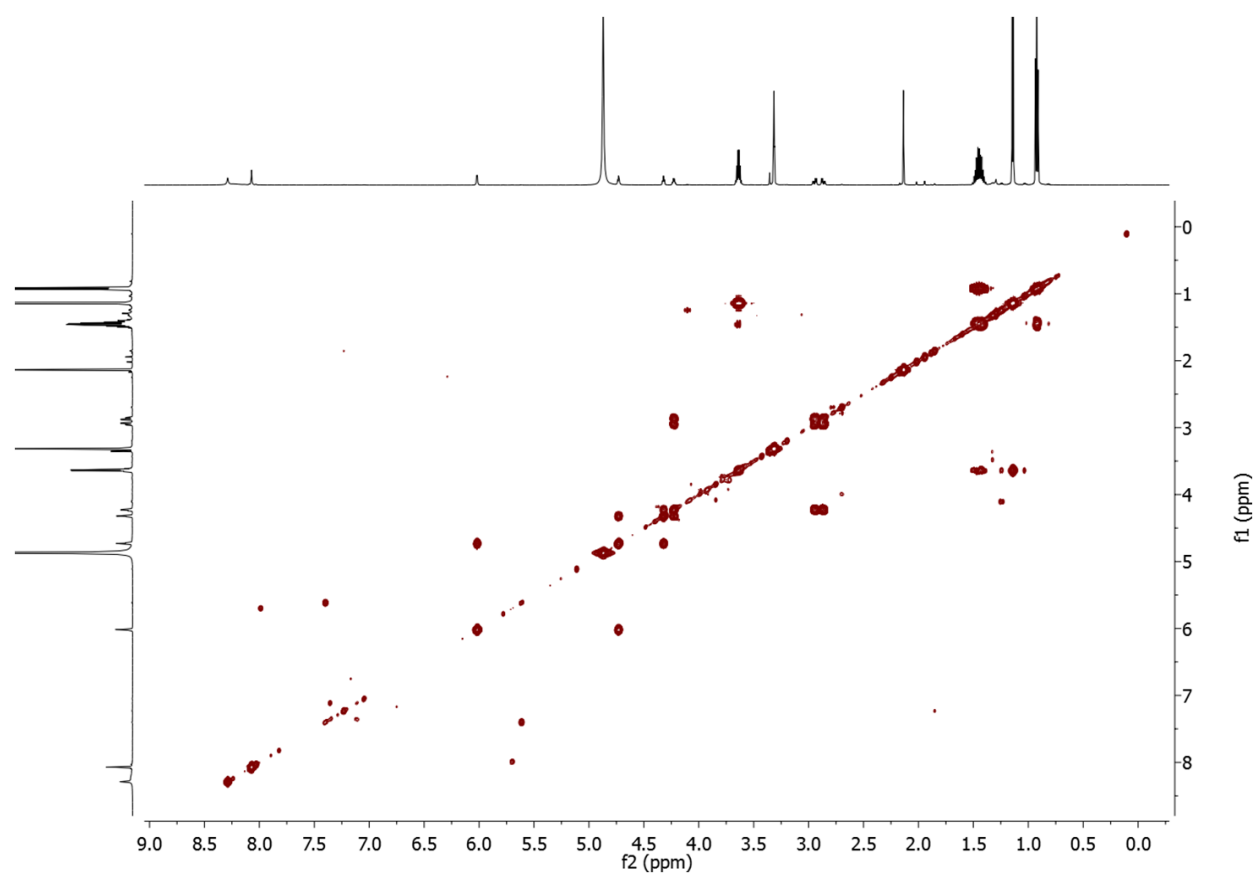

Figure S12. HMBCAD spectrum of compound (3).

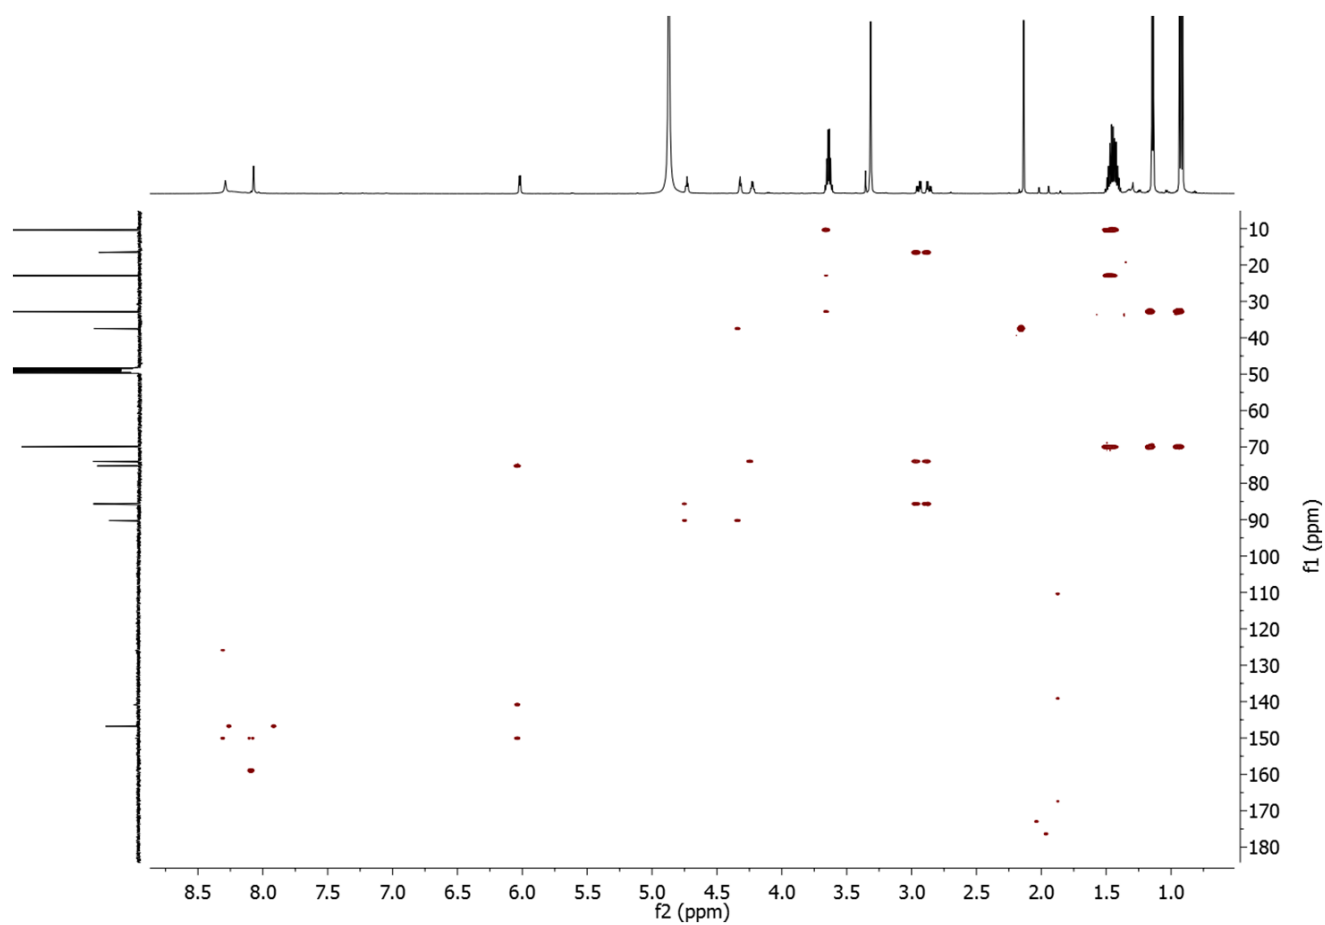

Figure S13. *Micromonospora* sp. K310 growing on starch casein agar with sea salts.

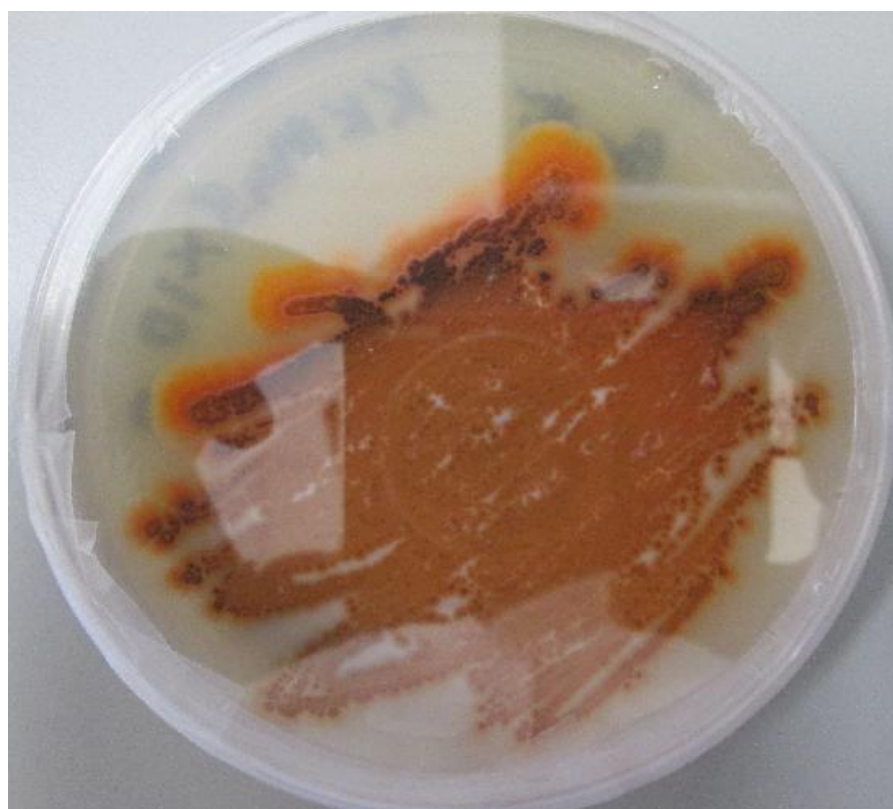



**Figure S14.** PDA/UV profiles obtained from the HPLC/HRESIMS data of the crude extracts of *Micromonospora* sp. K310.

F29

8/17/2013 2:50:41 AM

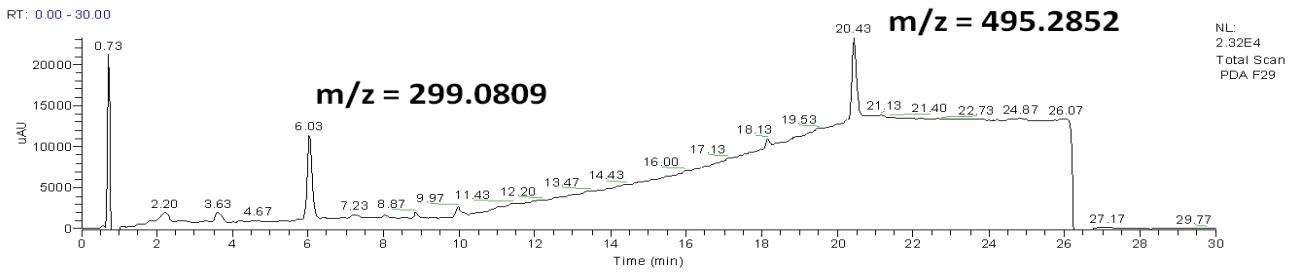

F29 #183 RT: 6.07 AV: 1 NL: 1.42E5 microAU

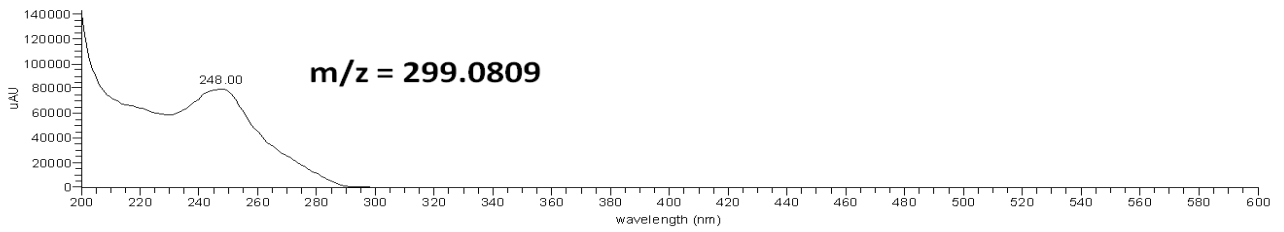

F29 #615 RT: 20.47 AV: 1 NL: 3.48E5 microAU

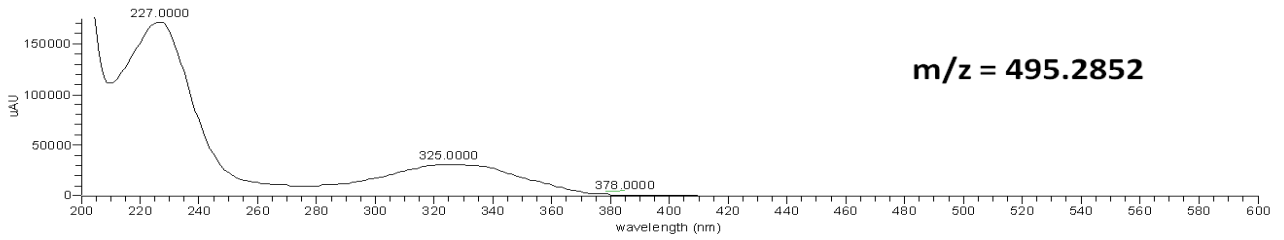

Supplement: s1 [file s1]
